# Supplementary material for: Experimental and theoretical demonstration of ferroelectric anisotropy in a one-dimensional copper(ii)-based coordination polymer
Source: Royal Society of Chemistry journal article supplement (doi:10.1039/b820500k), 2009-01-01
Supplement: b820500k.pdf [file b820500k.pdf]

**Electronic Supplementary Information (ESI) for the manuscript  
“Experimental and theoretical Demonstration of Ferroelectric  
Anisotropy in a One-dimensional Copper(II)-based Coordination  
Polymer”**

**Hai-Xia Zhao, Gui-Lin Zhuang, Shu-Ting Wu, La-Sheng Long, Hai-Yan Guo,  
Zuo-Guang Ye, Rong-Bin Huang and Lan-Sun Zheng**

**Computational Methodology:**

The partial geometry optimization of asymmetry unit of **1**, which was derived from X-ray single crystal diffraction, was performed by freezing non-hydrogen atoms at the level of B3LYP[1-3]/6-31G\*\*.<sup>4-6</sup> The electric polarization of **1** at *c* axis shown in Table S1 was obtained from the generalized gradient approximations (BLYP,<sup>1,7</sup> BP86,<sup>7,8</sup> BPW91<sup>7,9</sup>), the hybrid functional methods (B3LYP,<sup>1-3</sup> B3P86,<sup>3,8,10,11</sup> B3PW91<sup>3,10-12</sup>), and the local spin density approach (SVWN5<sup>13,14</sup>) respectively. All calculation was performed with GAUSSIAN 03 package.<sup>15</sup>

**References**

- 1 C. Lee, W. Yang, R. G. Parr, *Phys. Rev. B*, 1988, **37**, 785.
- 2 P. J. Stephens, F. J. Devlin, C. F. Chabalowski, M. J. Frisch, *J.Phys. Chem.*, 1994, **98**, 11623.
- 3 A. D. Becke, *J. Chem. Phys.*, 1993, **98**, 5648.
- 4 P. C. Hariharan, J. A. Pople, *Mol. Phys.*, 1974, **27**, 209.
- 5 M. S. Gordon, *Chem. Phys. Lett.*, 1980, **76**, 163.

- 6 M. J. Frisch, J. A. Pople, J. S. Binkley, *J. Chem. Phys.*, 1984, **80**, 3265.
- 7 A. D. Becke, *Phys. Rev. A*, 1988, **38**, 3098.
- 8 J. P. Perdew, *Phys. Rev. B*, 1986, **33**, 8822.
- 9 J. P. Perdew, J. A. Chevary, S. H. Vosko, K. A. Jackson, M. R. Pederson, D. J. Singh, C. Fiolhais, *Phys. Rev. B*, 1992, **46**, 6671.
- 10 A. D. Becke, *J. Chem. Phys.*, 1992, **96**, 2155.
- 11 A. D. Becke, *J. Chem. Phys.*, 1992, **97**, 9173.
- 12 J. P. Perdew, Y. Wang, *Phys. Rev. B*, 1992, **45**, 13244.
- 13 P. Hohenberg, W. Kohn, *Phys. Rev.*, 1964, **136**, B864; W. Kohn, L. J. Sham, *Phys. Rev.*, 1965, **140**, A1133; J. C. Slater, In *Quantum Theory of Molecules and Solids* Vol. **4**, *The Self-Consistent Field for Molecular and Solids*, McGraw-Hill, New York 1974.
- 14 S. H. Vosko, L. Wilk, M. Nusair, *Can. J. Phys.*, 1980, **58**, 1200.
- 15 M. J. Frisch, et al. *Gaussian 03*, revision A.7; Gaussian, Inc.: Pitts-burgh, PA, 2003.

**Table S1.** The calculated electric polarization of **1** along *c* axis ( $|^*P_c|$ ,  $\mu\text{C}\cdot\text{cm}^{-2}$ ) obtained from diverse methods.

|         | B3LYP  | BLYP  | BP86  | BPW91 |
|---------|--------|-------|-------|-------|
| 6-31G** | 1.262  | 1.138 | 1.151 | 1.149 |
|         | B3PW91 | B3P86 | SVWN5 |       |
| 6-31G** | 1.270  | 1.259 | 1.199 |       |

[\*]  $\vec{P}_c = Z\vec{\mu}\cos(\vec{\mu} \wedge \vec{c})/V$  where *Z* is cell formula unit,  $\vec{\mu}$  is the dipole moment in the asymmetry unit of **1**,  $\vec{\mu} \wedge \vec{c}$  is the angle between  $\vec{\mu}$  and  $\vec{c}$ , *V* is the cell volume of **1**.
